# Supplementary material for: Highly efficient green phosphorescent organic light-emitting diodes with low efficiency roll-off based on iridium(iii) complexes bearing oxadiazol-substituted amide ligands
Source: Royal Society of Chemistry journal article supplement (doi:10.1039/c6tc01041e), 2016-01-01
Supplement: c6tc01041e1.pdf [file c6tc01041e1.pdf]

## Supporting information

### Highly Efficient Green Phosphorescent Organic Light-Emitting Diodes with Small Efficiency Roll-Off Based on Iridium Complexes Bearing Oxadiazol-Substituted Amide Ligands

Fuli Zhang,<sup>a</sup> Weiling Li,<sup>b</sup> Yue Yu,<sup>c</sup> Yiming Jing,<sup>d</sup> Dongxin Ma,<sup>e</sup> Fuqiang Zhang,<sup>a</sup> Suzhi Li,<sup>a</sup> Guangxiu Cao,<sup>a</sup> Zhongyi Li,<sup>a</sup> Ge Guo,<sup>a</sup> Bin Wei,<sup>\*b</sup> Depan Zhang,<sup>a</sup> Lian Duan,<sup>c</sup> Chunyang Li,<sup>a</sup> Yafei Feng,<sup>a</sup> and Bin Zhai<sup>\*a</sup>

<sup>a</sup> College of Chemistry and Chemical Engineering, Shangqiu Normal University, Shangqiu 476000, P. R. China.

<sup>b</sup> School of Materials Science and Engineering, Shanghai University, Shanghai 200072, P. R. China.

<sup>c</sup> Key Laboratory of Photonics Technology for Information, Xi'an Jiaotong University, Xi'an 710049, P. R. China.

<sup>d</sup> State Key Laboratory of Coordination Chemistry, Collaborative Innovation Center of Advanced Microstructures, Collaborative Innovation Center of Chemistry for Life Sciences, School of Chemistry and Chemical Engineering, Nanjing University, Nanjing 210093, P. R. China.

<sup>e</sup> Key Lab of Organic Optoelectronics and Molecular Engineering of Ministry of Education, Department of Chemistry, Tsinghua University, Beijing 100084, P. R. China.

E-mail: zhaibin\_1978@163.com; bwei@shu.edu.cn

#### Contents:

|                                                                                            |    |
|--------------------------------------------------------------------------------------------|----|
| 1. <sup>1</sup> H-NMR (600 M) spectrum of HPOXD in Chloroform- <i>d</i> .....              | S2 |
| 2. <sup>1</sup> H-NMR (600 M) spectrum of complex <b>1</b> in Chloroform- <i>d</i> .....   | S3 |
| 3. <sup>1</sup> H-NMR (600 M) spectrum of complex <b>2</b> in Chloroform- <i>d</i> .....   | S4 |
| 4. ESI-MS spectra of complexes <b>1</b> and <b>2</b> .....                                 | S5 |
| 5. Luminance–Current efficiency curves of devices G1 and G2.....                           | S5 |
| 6. Electroluminescence spectra of devices G2a and G2b.....                                 | S5 |
| 7. <i>V</i> – <i>L</i> – <i>J</i> curves of devices G2a and G2b.....                       | S6 |
| 8. The procedure to calculate the external quantum efficiency ( $\eta_{\text{ext}}$ )..... | S6 |

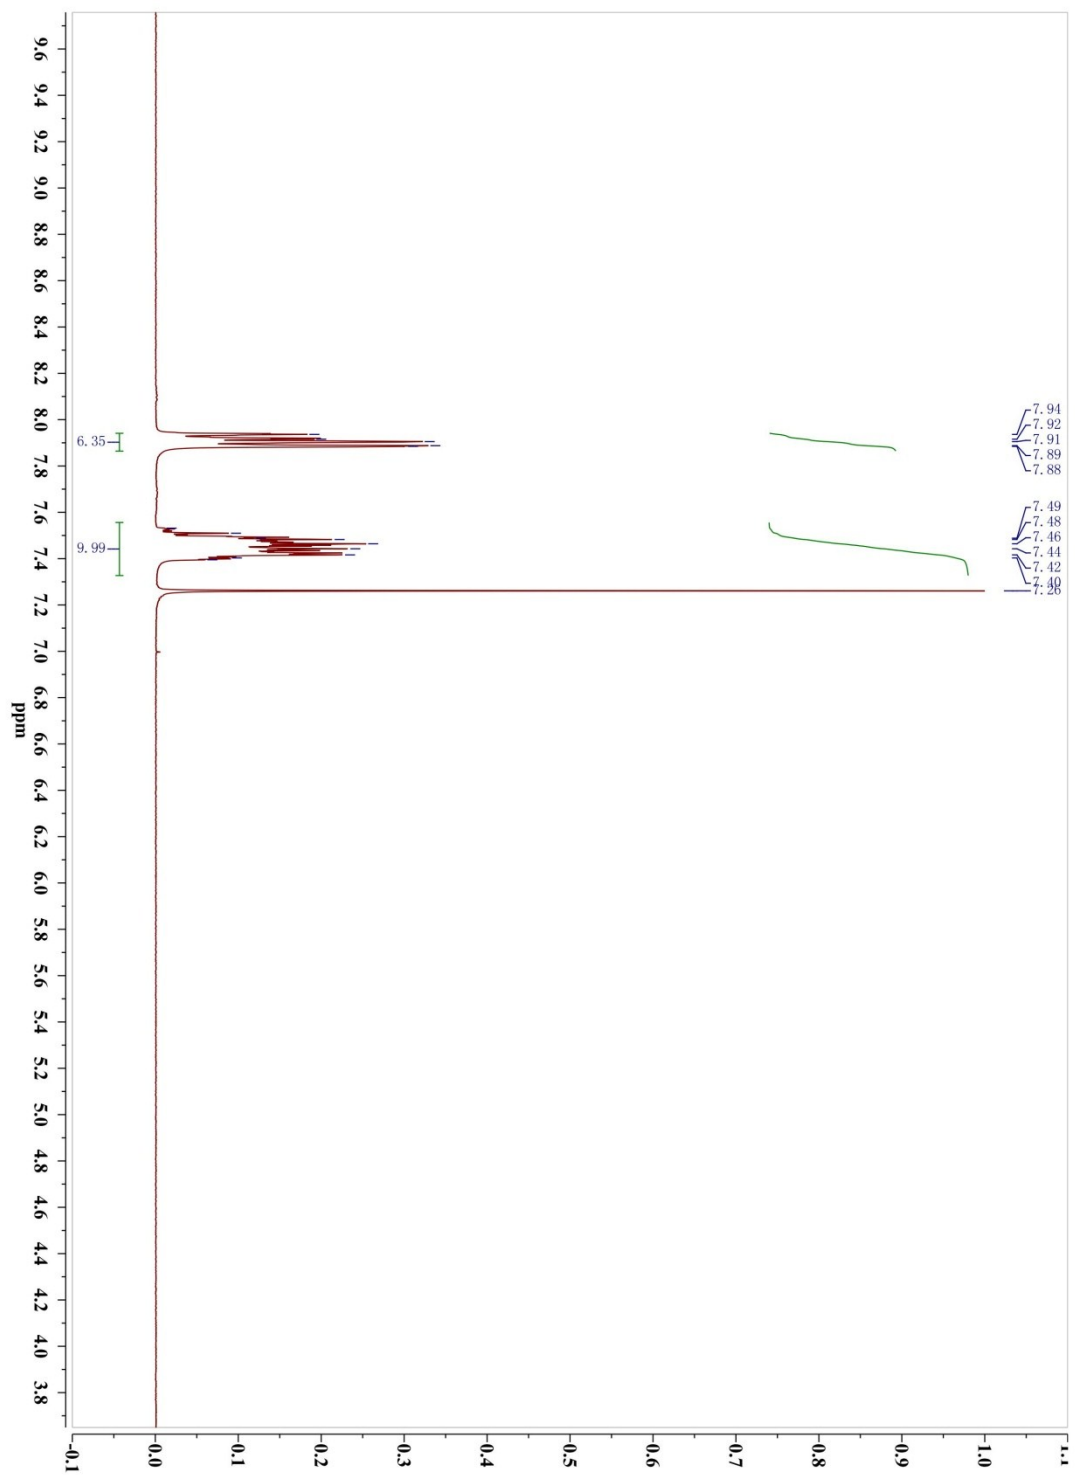

**Figure S1.**  $^1\text{H-NMR}$  (600 M) spectrum of HPOXD in Chloroform- $d$ .

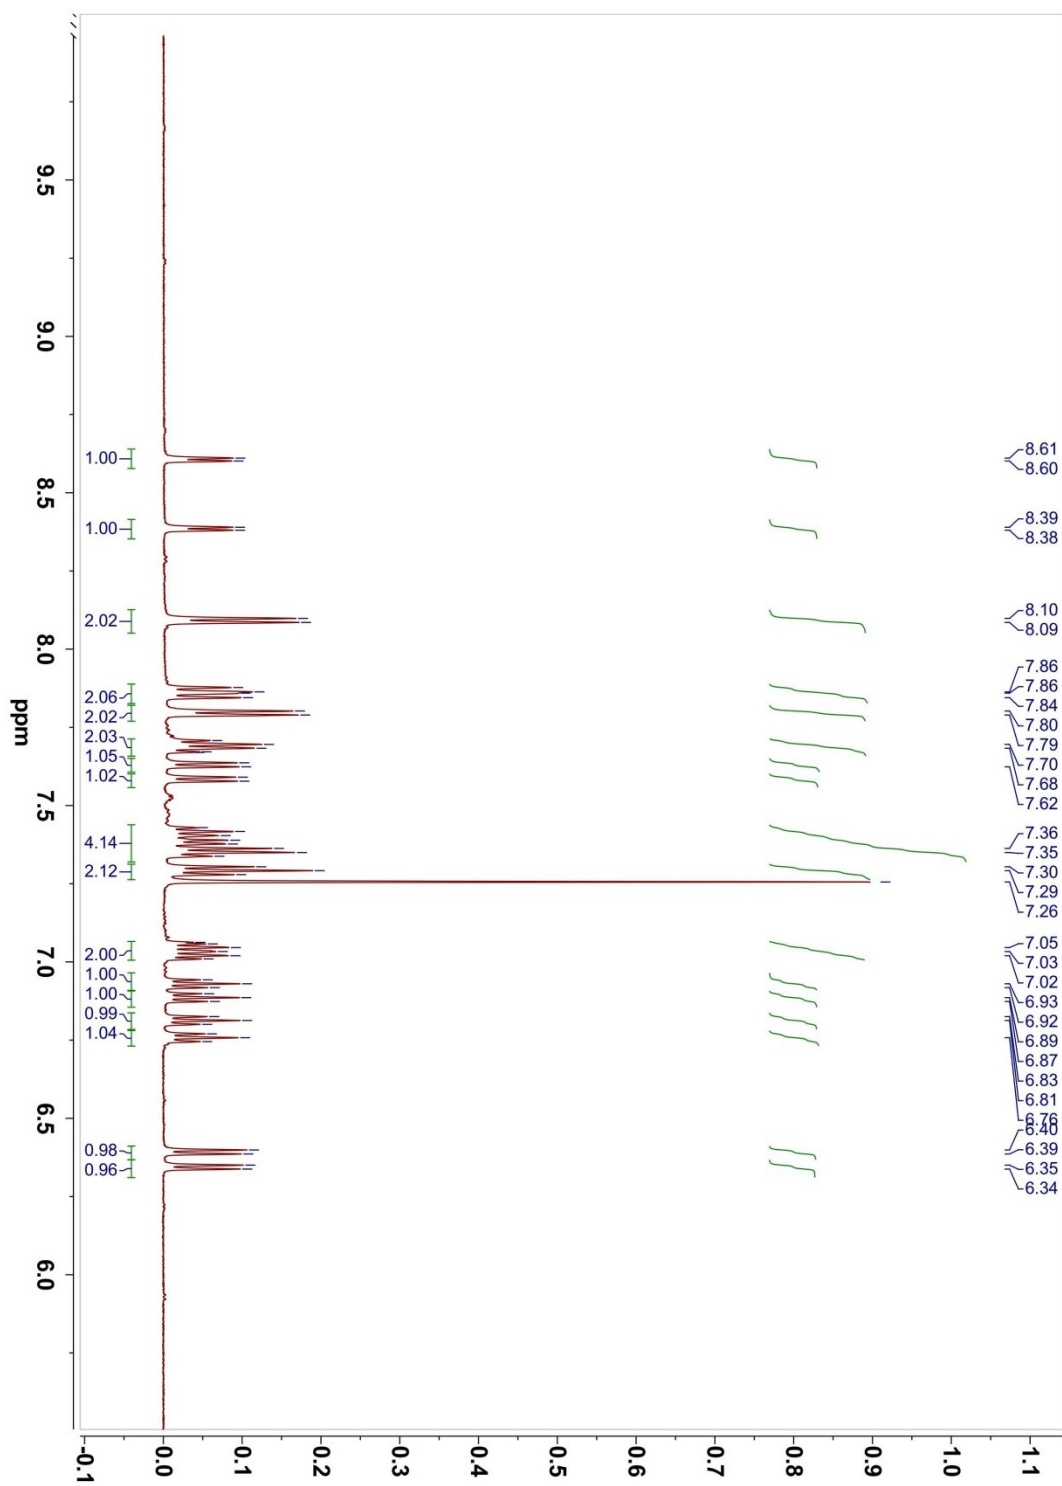

**Figure S2.**  $^1\text{H-NMR}$  (600 M) spectrum of complex 1 in  $\text{Chloroform-}d$ .

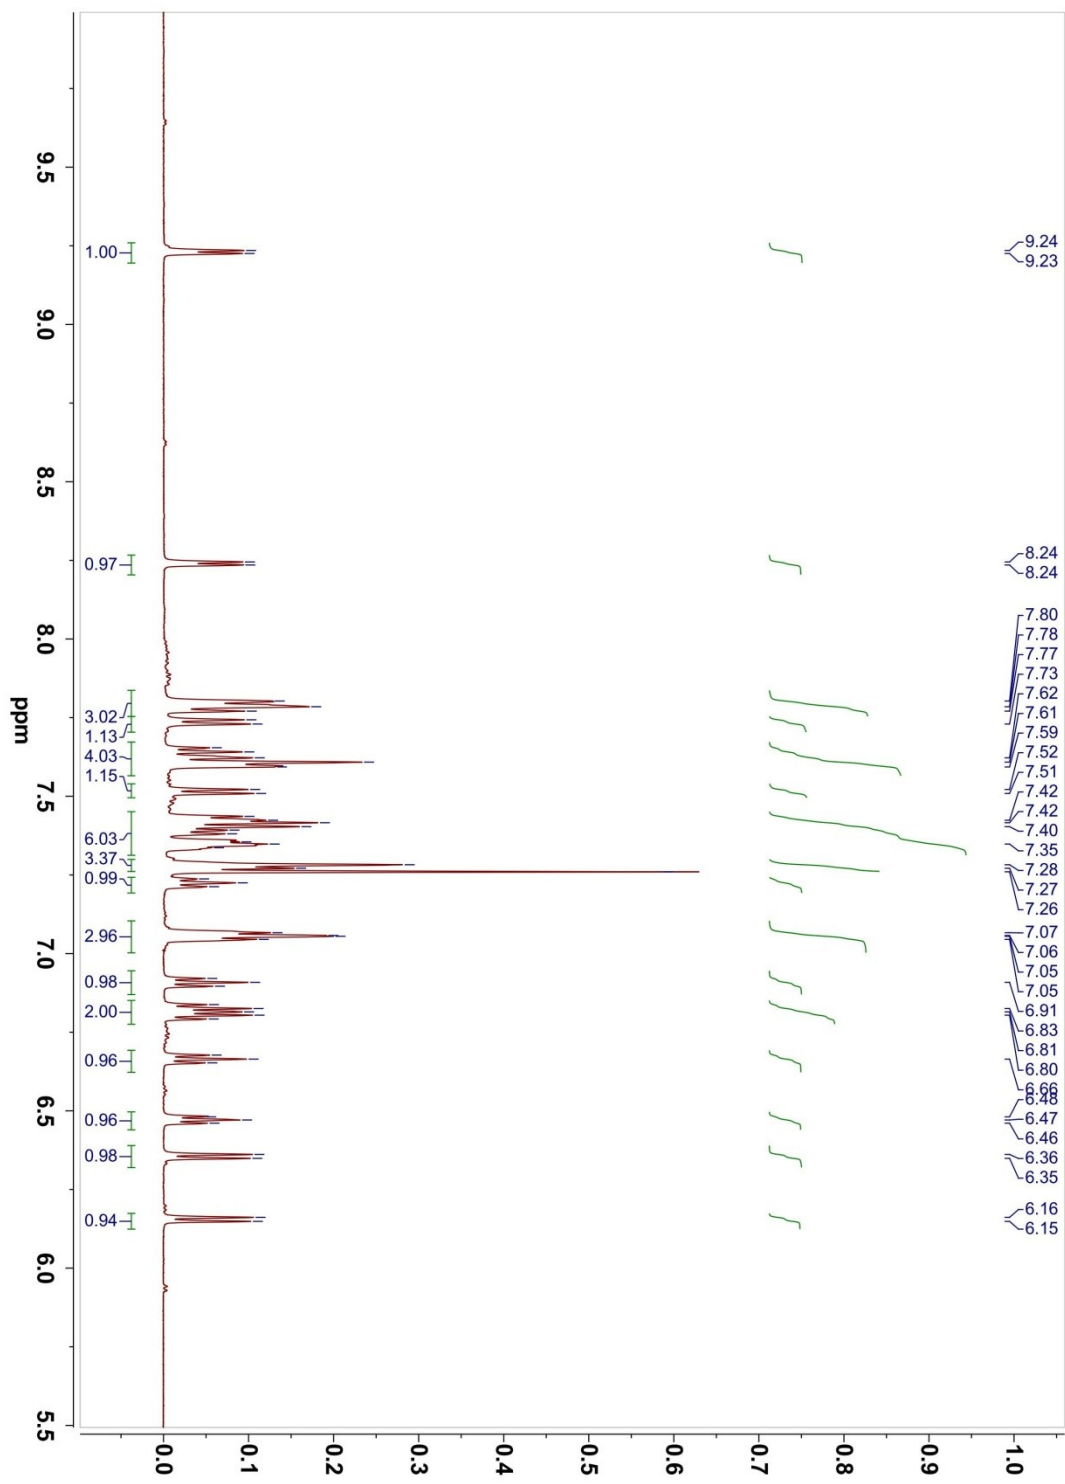

Figure S3.  $^1\text{H-NMR}$  (600 M) spectrum of complex 2 in  $\text{Chloroform-}d$ .

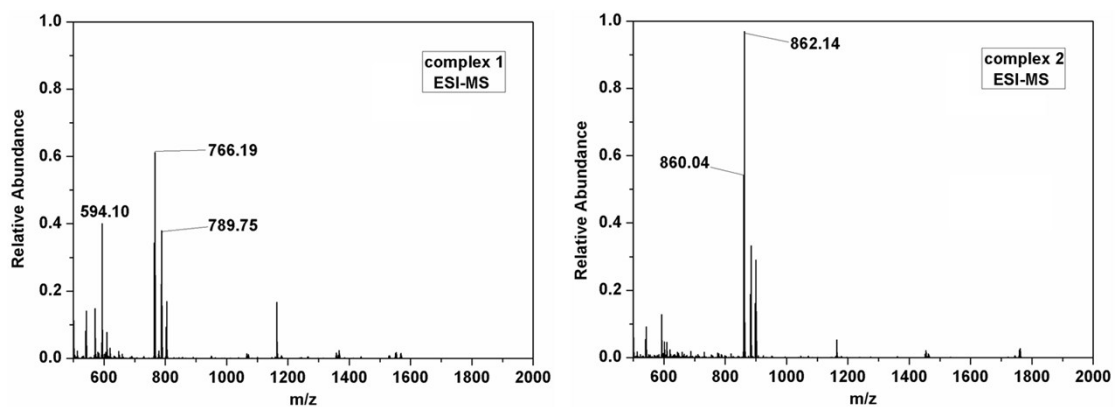

Figure S4. ESI-MS spectra of complexes 1 and 2.

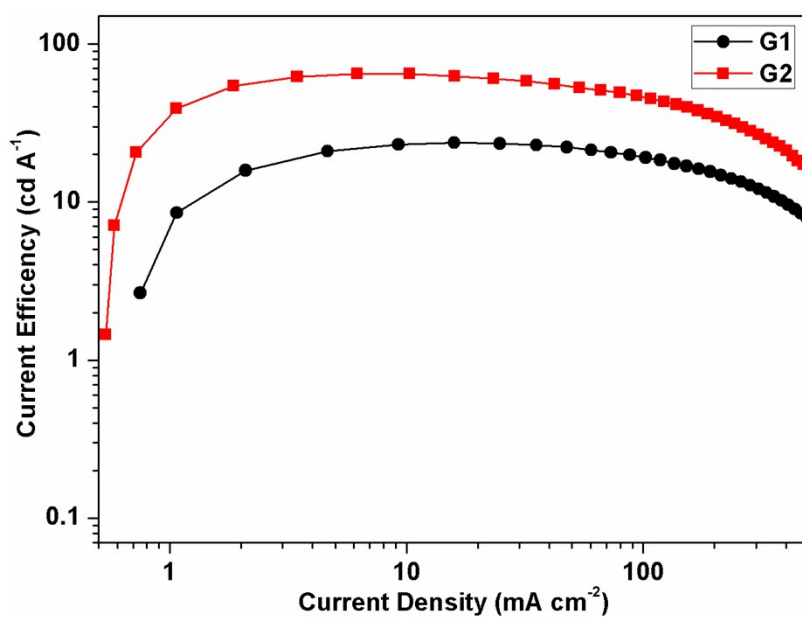

Figure S5. Current density - Current efficiency curves of devices G1 and G2.

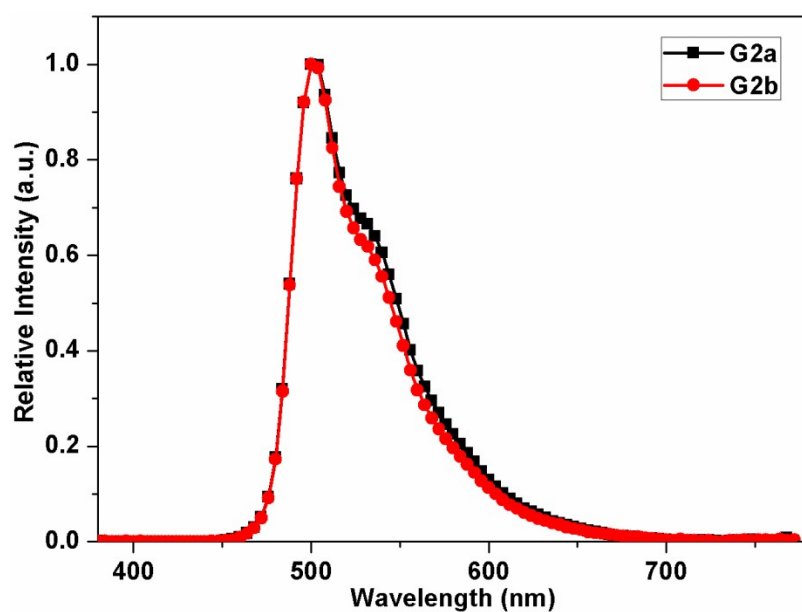

**Figure S6.** Electroluminescence spectra of devices G2a and G2b at 6 V.

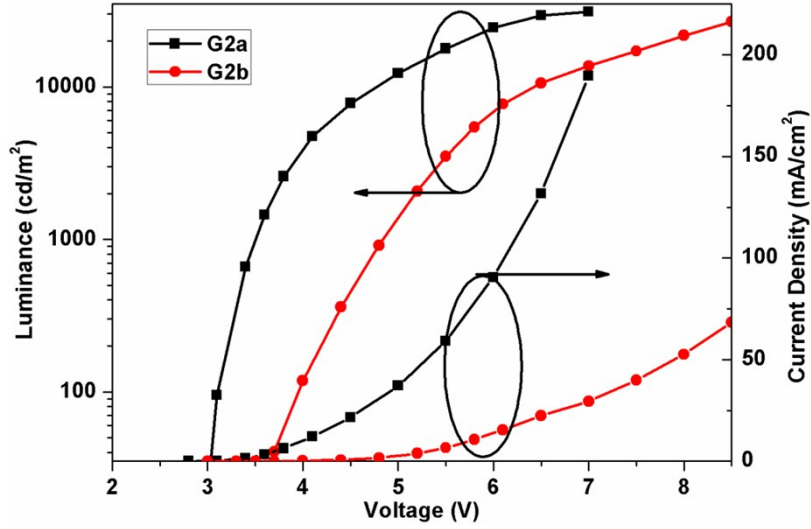

**Figure S7.**  $V-L-J$  curves of devices G2a and G2b.

**The procedure to calculate the external quantum efficiency ( $\eta_{\text{ext}}$ ):**

The OLEDs were placed in focus plane of spectrophotometer and all emitted photons within an angle of 10 degrees from the uniform glass side were captured. The  $\eta_{\text{ext}}$  was calculated by taking in the forwarding-direction brightness ( $L_0$ ), current density ( $J$ ) and electroluminescence spectra into consideration:

$$\eta_{\text{ext}} = \frac{\pi e L_0}{K_m h c J} \frac{\int I(\lambda) \lambda d\lambda}{\int I(\lambda) V(\lambda) d\lambda}$$

whereas  $e$  is elementary charge ( $e = 1.6 \times 10^{-19} \text{C}$ ),  $h$  is Planck constant ( $h = 6.62 \times 10^{-34} \text{J} \cdot \text{s}$ ),  $c$  is speed of light ( $c = 2.9999 \times 10^8 \text{m/s}$ ),  $K_m$  is a constant ( $K_m = 683 \text{lm/W}$ ). The  $I(\lambda)$  is the normalized luminescence intensity in specific wavelengths and  $V(\lambda)$  is the normalized visibility function (photopic vision) in specific wavelengths.

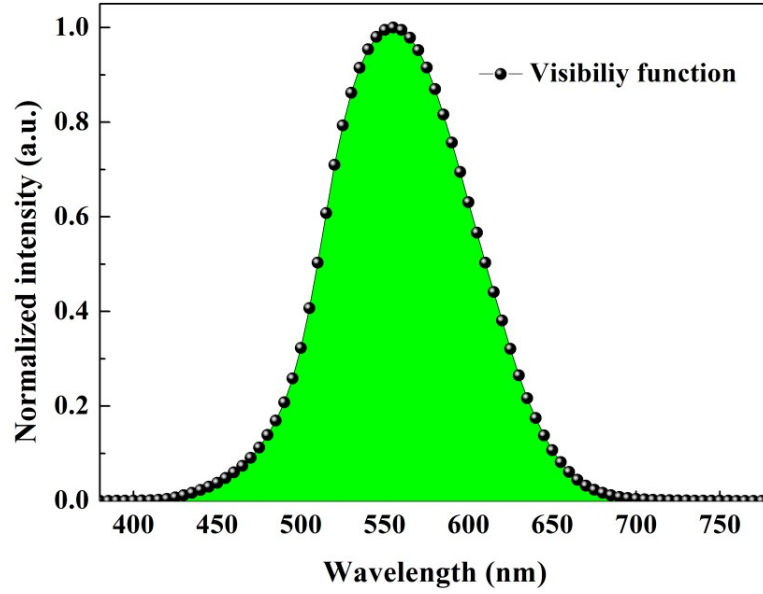

**Figure S8.** Visibility function curve in photopic vision.

First, The constant values were substituted into the calculation and the constant coefficient of  $\frac{\pi e}{K_m h c}$  was obtained. The  $\frac{L_0}{J}$  represented the current efficiency of devices.

Next, the integral formula of  $\frac{\int I(\lambda) \lambda d\lambda}{\int I(\lambda) v(\lambda) d\lambda}$  was calculated based on the overlap area across the whole visible range (300-800 nm).
